# Supplementary material for: Droplet manipulation on a structured shape memory polymer surface
Source: Royal Society of Chemistry journal article supplement (doi:10.1039/c6lc01354f), 2017-01-01
Supplement: c6lc01354f1.pdf [file c6lc01354f1.pdf]

## Electronic Supplementary Information

### Droplet Manipulation on A Structured Shape Memory Polymer Surface

J. Park and S. Kim

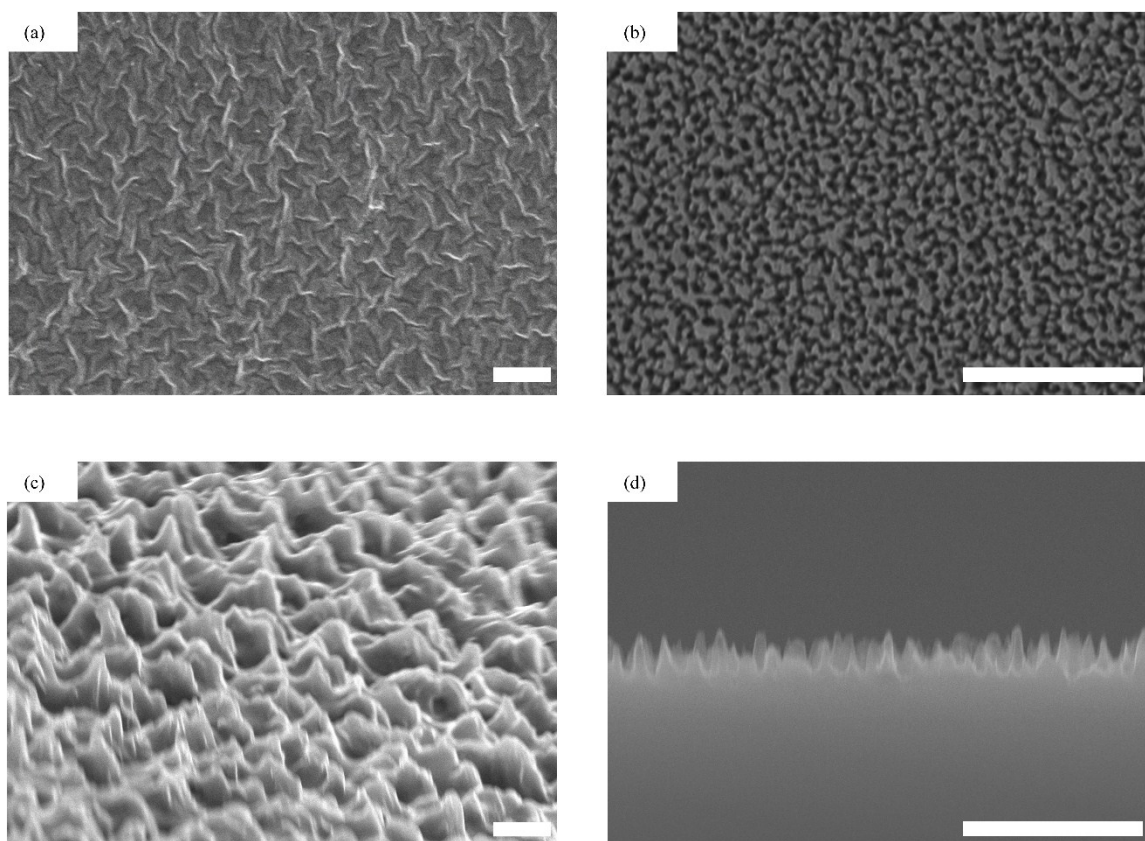

**Fig 1S.** SEM images of nanostructures on SMP pillar array and Si master. White scale bars indicate 1  $\mu\text{m}$  (a) Nanostructure on SMP pillar array ( top view ), (b) Nanostructure on Si master ( top view ), (c) 60° tilted view of Nanostructure on SMP pillar array, (d) Side view of Nanostructure on Si master

## Step by step calculation of values in Table. 1

### Used values in calculations

- **Geometric values** :  $N_1, N_2, a, b, c,$  and  $d$

| $N_1$ | $N_2$ | $a$                 | $b$                 | $c$                  | $d$                  |
|-------|-------|---------------------|---------------------|----------------------|----------------------|
| 1     | 27    | 96.82 $\mu\text{m}$ | 24.84 $\mu\text{m}$ | 158.60 $\mu\text{m}$ | 300.00 $\mu\text{m}$ |

- **Measured values** : apparent contact angle on nano-textured original pillar array,  $\theta_{ori}^*$

### 1. Calculating solid fractions.

#### On original structure

$$f_{ori} = \frac{N_1 \cdot a^2}{d^2} = 0.10$$

#### On deform structure

$$f_{def} = \frac{N_1 \cdot c^2 + N_2 \cdot b^2}{d^2} = 0.46$$

### 2. Calculating roughness ratio.

**Smooth texture** ; for droplet on smooth original pillar array, roughness ratio is considered as 1

$$r_{ori} = 1$$

$$r_{def} = r_{ori} + \frac{4 \cdot N_1 \cdot a \cdot h_{def}}{N_1 \cdot c^2 + N_2 \cdot b^2} = 0.19$$

**Nano-texture** ; roughness ratio from nano-texture,  $r_{ori}$ , is back-calculated from the measured apparent contact angle on nano-textured original pillar array,  $\theta_{ori}^*$ .

$$r_{ori} = \frac{[(\cos \theta_{ori}^* + 1) f_{ori} - 1]}{\cos \theta_y} = 1.58$$

$$r_{def} = r_{ori} + \frac{4 \cdot N_1 \cdot a \cdot h_{def}}{N_1 \cdot c^2 + N_2 \cdot b^2} = 1.77$$

### 3. Calculating theoretical apparent contact angles

**With Smooth texture** ; values of  $r_{ori}$  and  $r_{def}$  are used those of smooth texture.

- **On original structure**

$$\cos \theta^* = r_{ori} \cdot f_{ori} \cdot \cos \theta_y + f_{ori} - 1 = 160.8^\circ$$

- **On deformed structure**

$$\cos \theta^* = r_{def} \cdot f_{def} \cdot \cos \theta_y + f_{def} - 1 = 140.0^\circ$$

**With Nano-texture** ; no calculation is done for the apparent contact angles on nano-textured original pillar array. value of  $r_{def}$  is used that of nano-texture.

- **Deformed structure**

$$\cos \theta^* = r_{def} \cdot f_{def} \cdot \cos \theta_y + f_{def} - 1 = 151.5^\circ$$
